# Supplementary material
Source: ML conference proceedings conference paper supplement (https://openreview.net/forum?id=kezNJydWvE)
Supplement: supplementary_material [file attachment]

# Clean Images are Hard to Reblur:

## Exploiting the Ill-Posed Inverse Task for Dynamic Scene Deblurring

Seungjun Nah, Sanghyun Son, Jaerin Lee, Kyoung Mu Lee

Computer **V**ision **L**ab.  
Dept. of ECE, ASRI  
Seoul National University  
<https://cv.snu.ac.kr>

# Clean Images are Hard to Reblur

- Can we estimate the **true motion blur** from a sharp image?

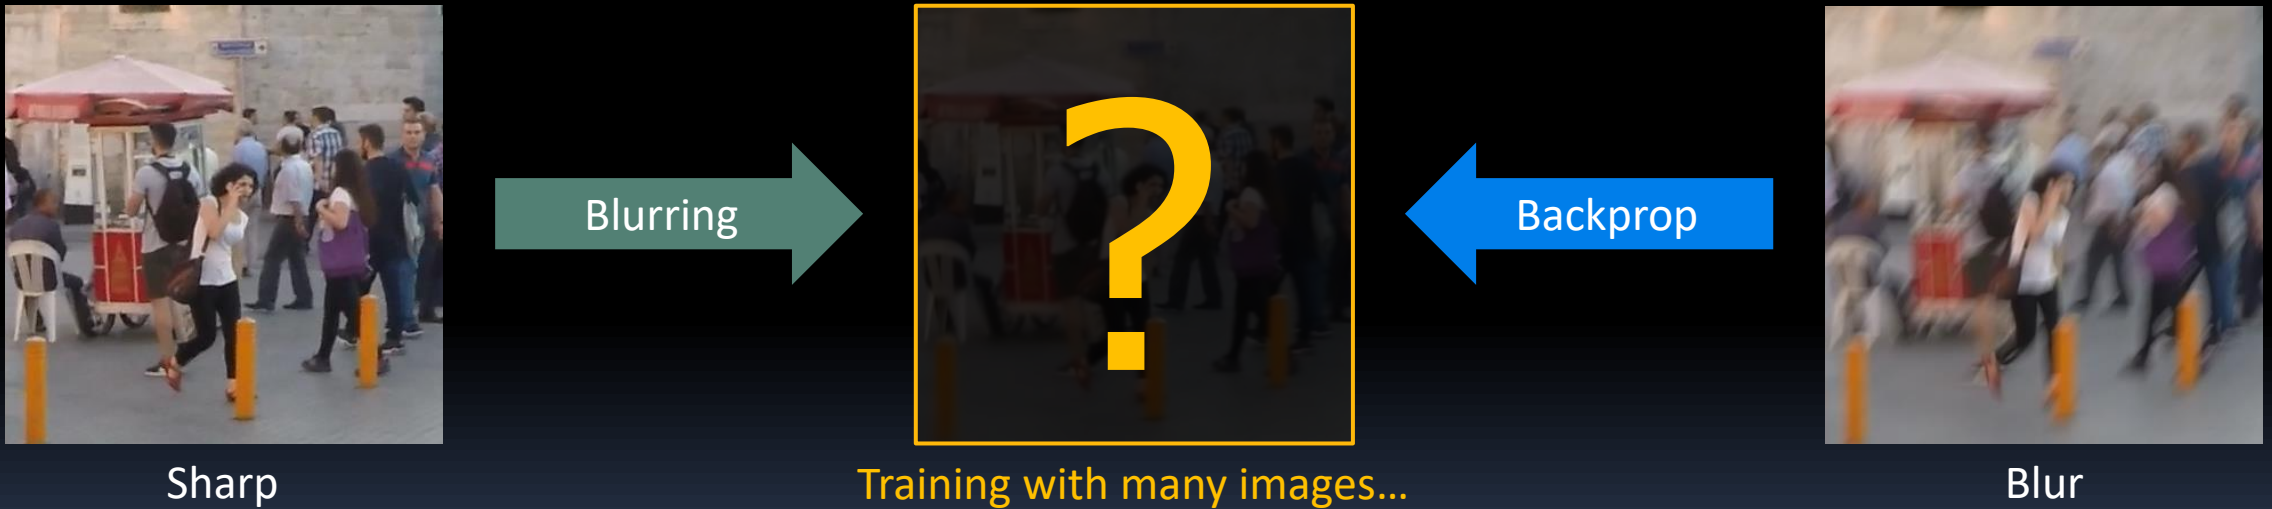

Trained & tested on GOPRO dataset

# Clean Images are Hard to Reblur

- Can we estimate the **true motion blur** from a sharp image?
- Not easily. It is an ill-posed problem.
- We are not trying to make an arbitrary blur.

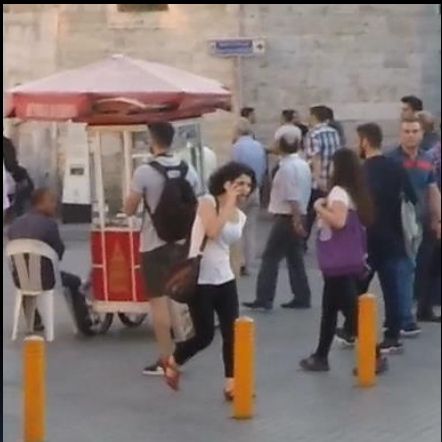

Sharp

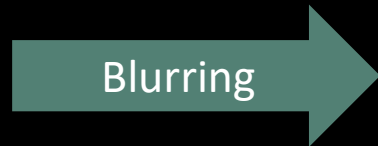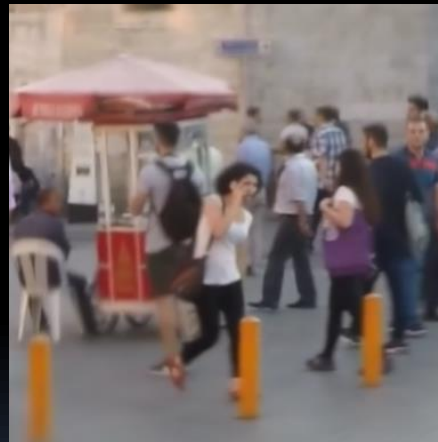

Blurring Fails

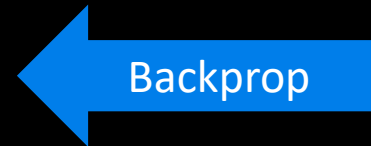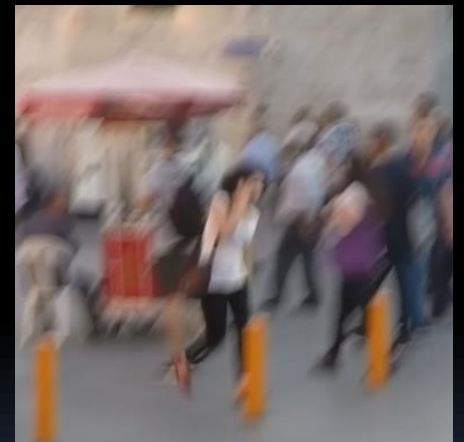

Blur

# Clean Images are Hard to Reblur

- What about **reblurring** (inverse of deblurring)?

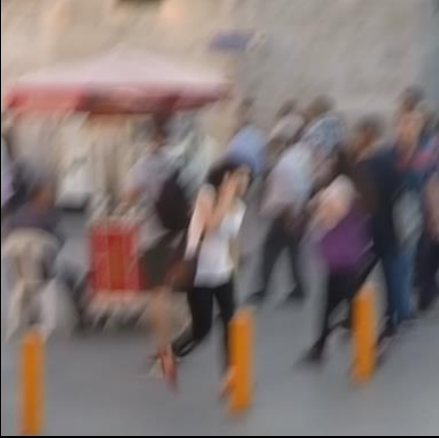

Blur

Deblurring

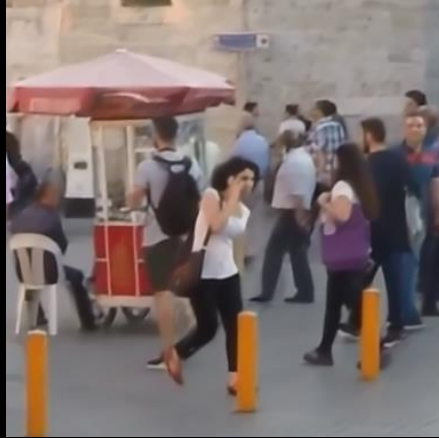

Deblurred

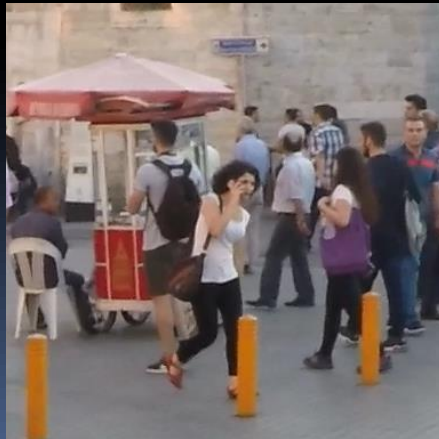

Sharp

Trained & tested on GOPRO dataset

# Clean Images are Hard to Reblur

- In contrast, **reblurring (inverse of deblurring)** is easy!

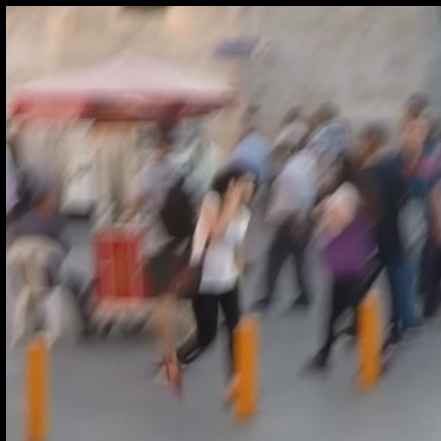

Blur

Deblurring

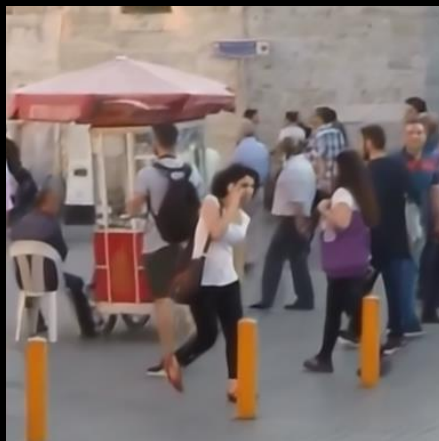

Deblurred

Reblurring

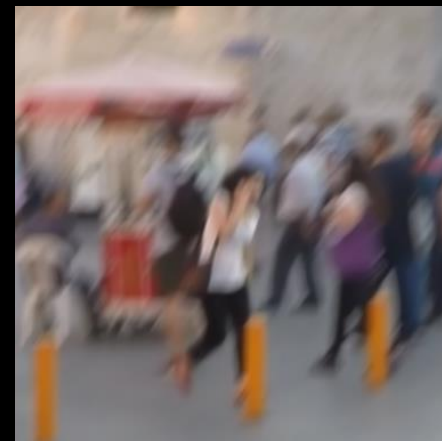

Reblurred

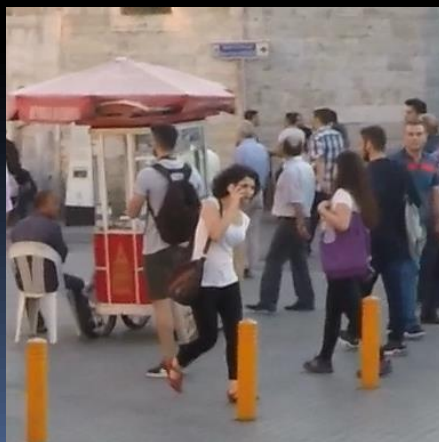

Sharp

Blurring

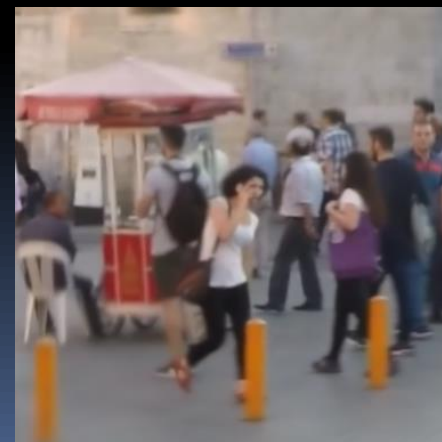

Blurred

Trained & tested on GOPRO dataset

# Why Are They Different?

- Because the kernel shape remains in the deblurred images.

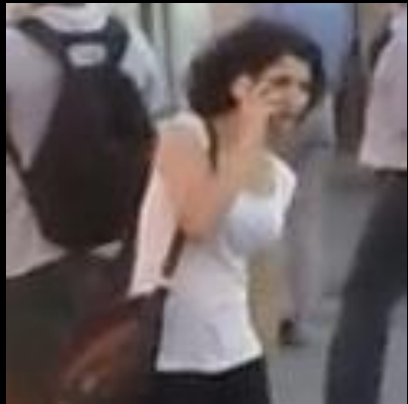

Sharp

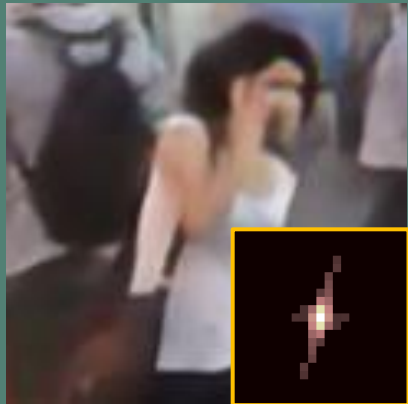

SRN

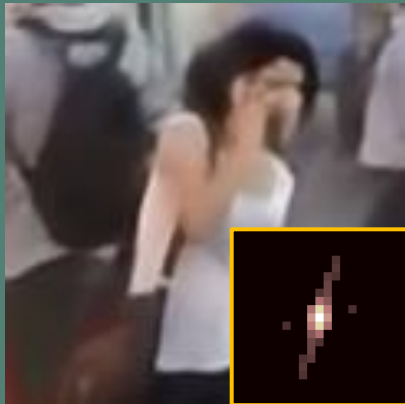

SE-Sharing

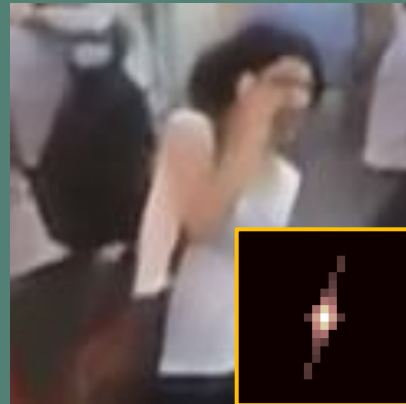

DeblurGAN-v2

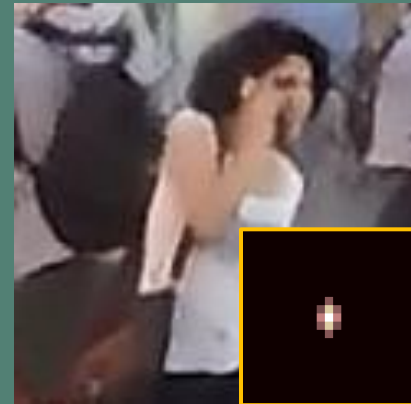

Ours

Deblurred

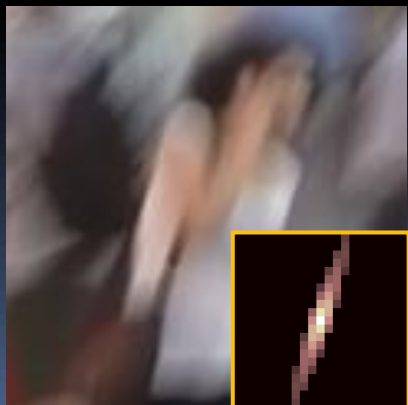

Blur



# Why Are They Different?

- Because the kernel shape remains in the deblurred images.

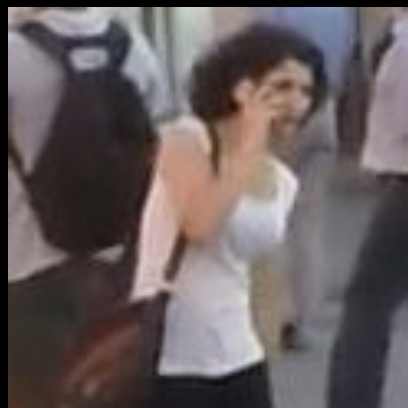

Sharp

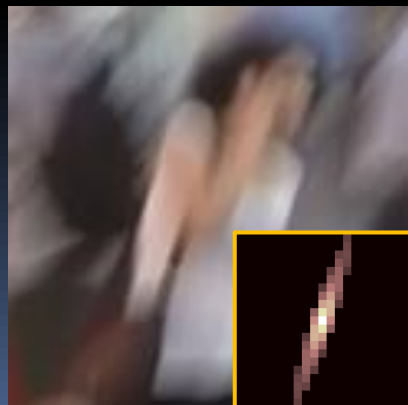

Blur

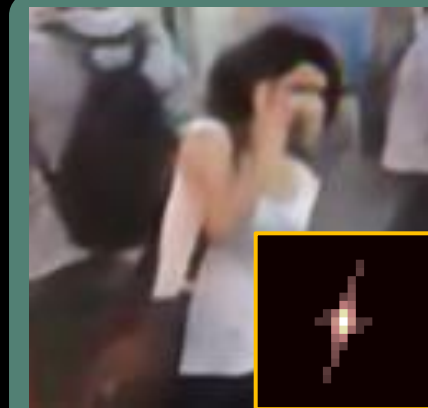

SRN

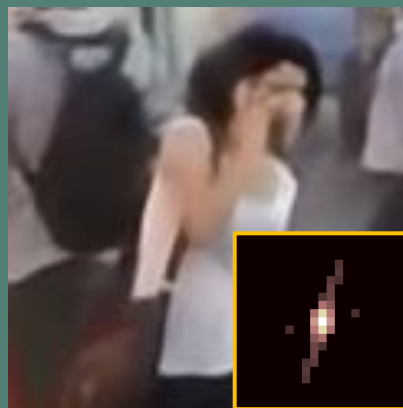

SE-Sharing

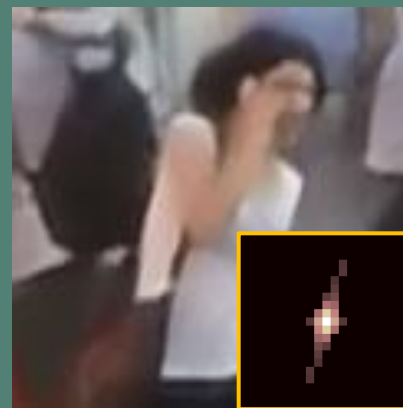

DeblurGAN-v2

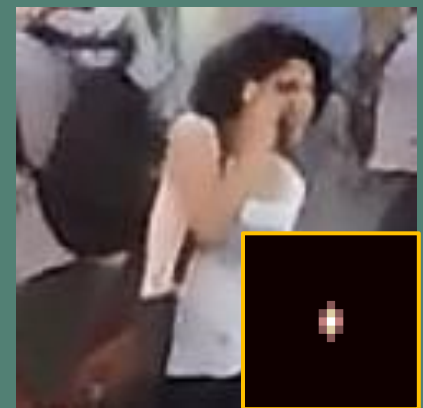

Ours

Deblurred

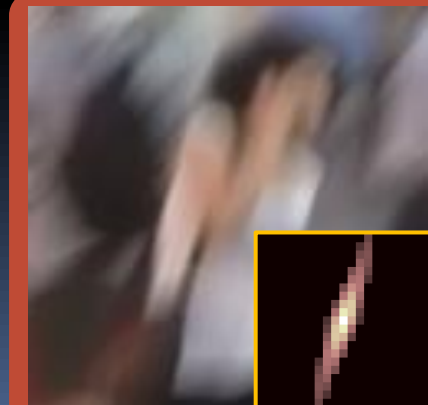

Reblurred

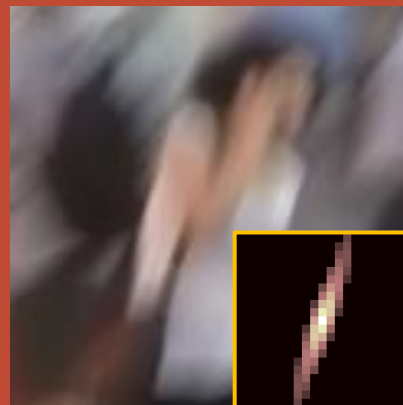

Reblurred

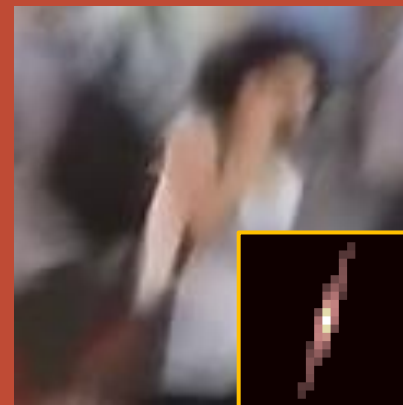

Reblurred

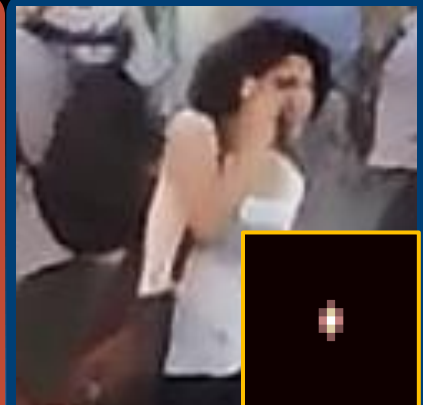

Reblurred

# How Can We Deblur Better?

- By making reblurring difficult!

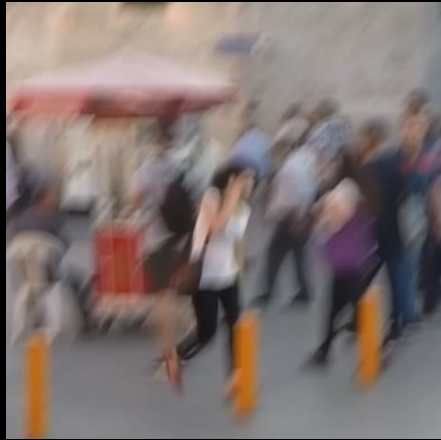

Blur

Deblurring

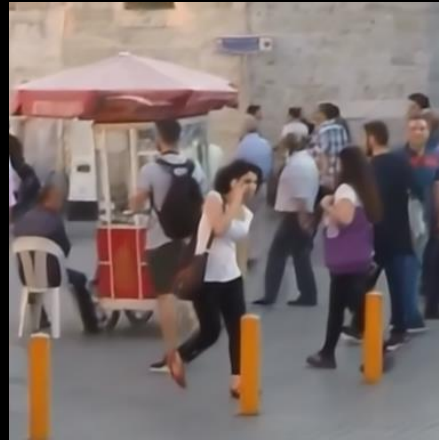

Deblurred

Reblurring

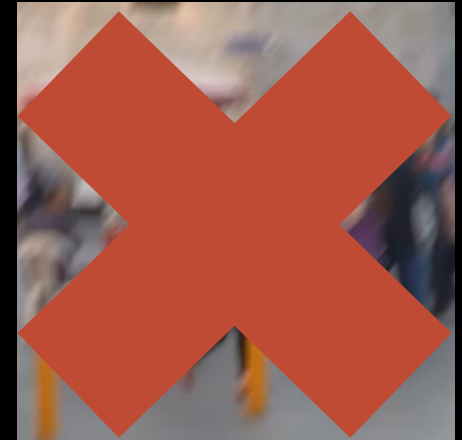

Reblurred

Blurring

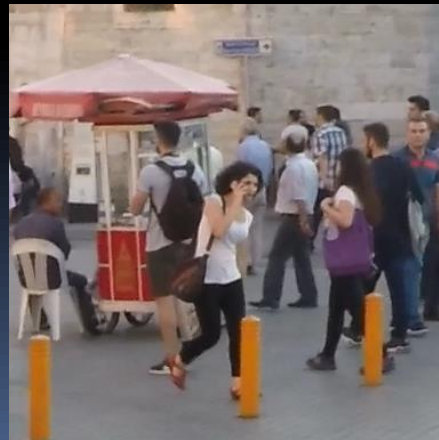

Sharp

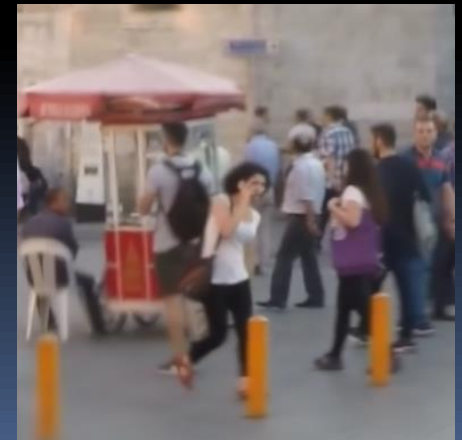

Blurred



# How Can We Deblur Better?

- By making reblurring difficult!



Blur

Deblurring

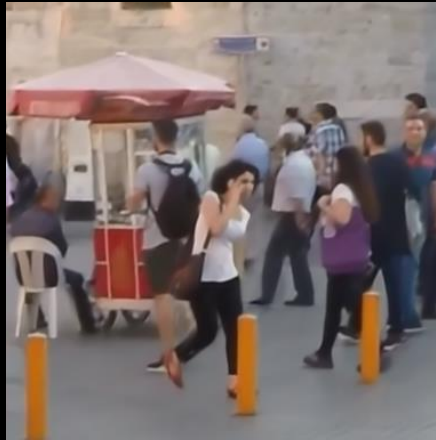

Deblurred

Reblurring



Reblurred



Blurred

Train with **reblurring loss** by joint optimization!

# Reblurring Module

- Reblurring Module  $\mathcal{M}_R$

- Estimate original blur
- Keep sharp image sharp

- Training

- **Blur reconstruction**
- Pseudo-sharp image
- **Sharpness preservation**

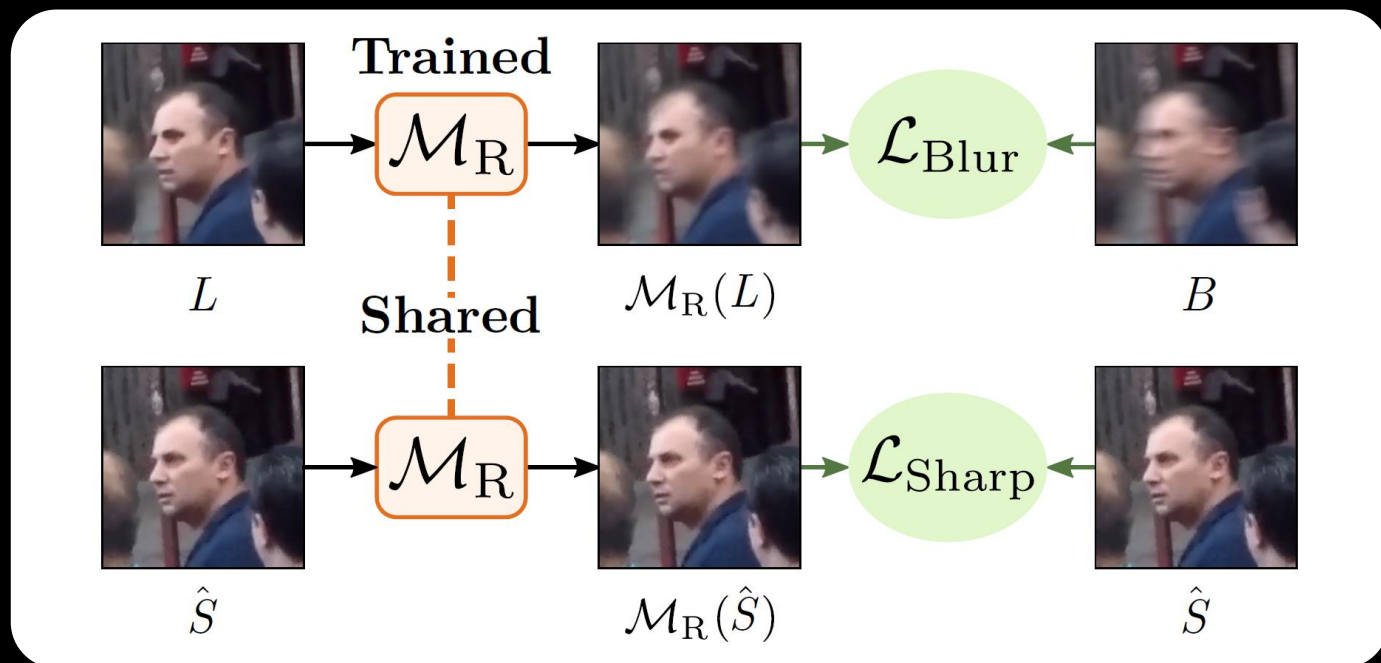

$$\mathcal{L}_{\text{Blur}} = \|\mathcal{M}_R(L) - B\|$$

$$\hat{S} = \mathcal{M}_D(S)$$

$$\mathcal{L}_{\text{Sharp}} = \|\mathcal{M}_R(\hat{S}) - \hat{S}\|$$

$$\mathcal{L}_R = \mathcal{L}_{\text{Blur}} + \mathcal{L}_{\text{Sharp}}$$

# Deblurring Module

- Deblurring Module  $\mathcal{M}_D$ 
  - Make blurry image sharp
  - Tries to resist reblurring

- Training
  - Deblurred image
  - Standard L1 loss
  - Amplified blur comparison

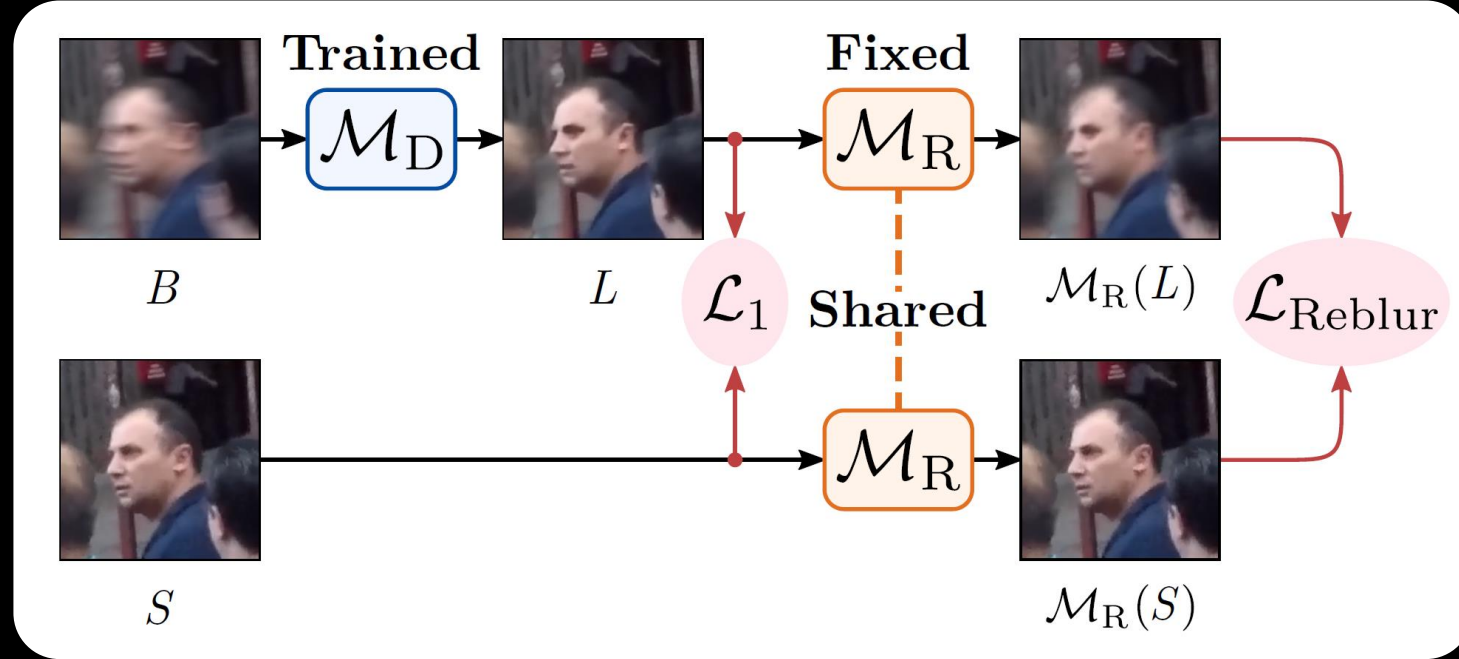

$$L = \mathcal{M}_D(B)$$

$$\mathcal{L}_1 = \|\mathcal{M}_D(B) - S\|$$

$$\mathcal{L}_{Reblur} = \|\mathcal{M}_R(L) - \mathcal{M}_R(S)\|$$

$$\mathcal{L}_D = \mathcal{L}_1 + \mathcal{L}_{Reblur}$$

# Conceptual Comparison of Loss Terms

- Adversarial loss:  $\mathcal{L}_{\text{Adv}}$ 
  - Tries to make image **realistic**
  - May not penalize real blurry image
- Reblurring loss:  $\mathcal{L}_{\text{Reblur}}$ 
  - Tries to make image **sharp**
  - Regardless of realism

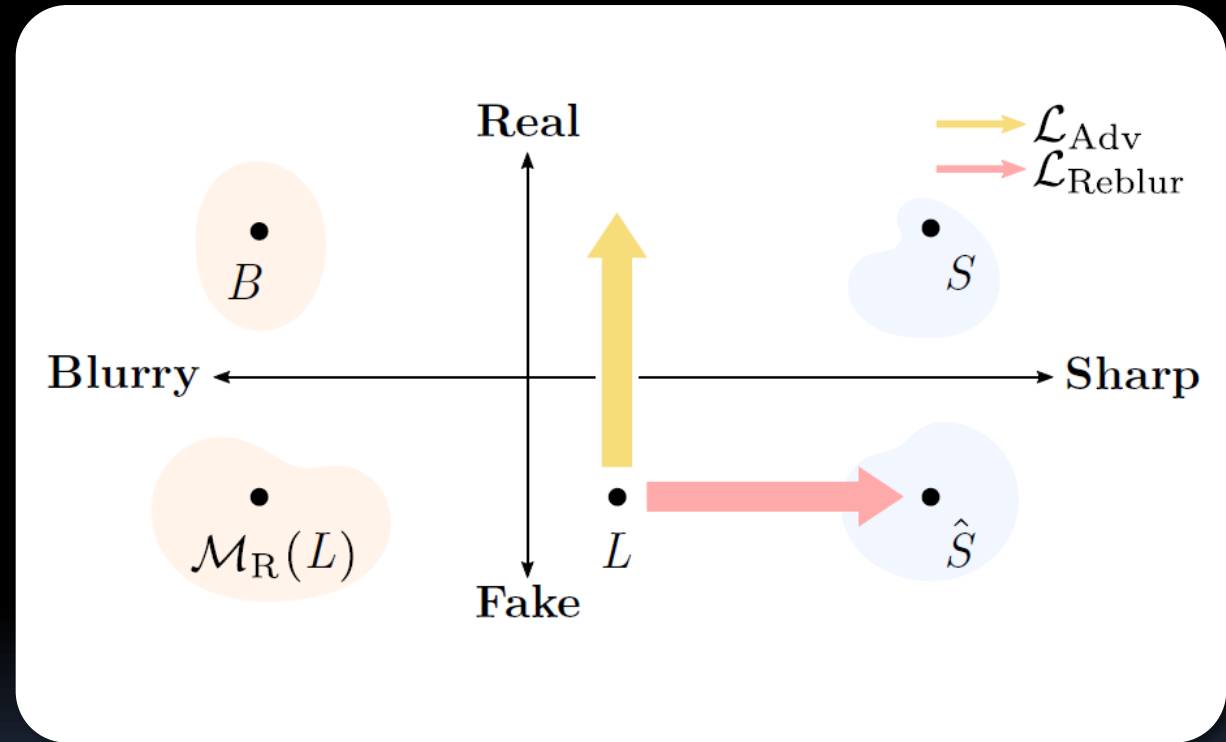

Domain of Images

# Self-Supervised Reblurring Loss

- No-reference sharpness measure

- $\mathcal{L}_{\text{Reblur}}^{\text{self}} = \|\mathcal{M}_{\text{R}}(L) - L_{*}\|$
- Can serve as a **self-supervised prior**

- Test-time adaptation

- Recursively minimize  $\mathcal{L}_{\text{Reblur}}^{\text{self}}$

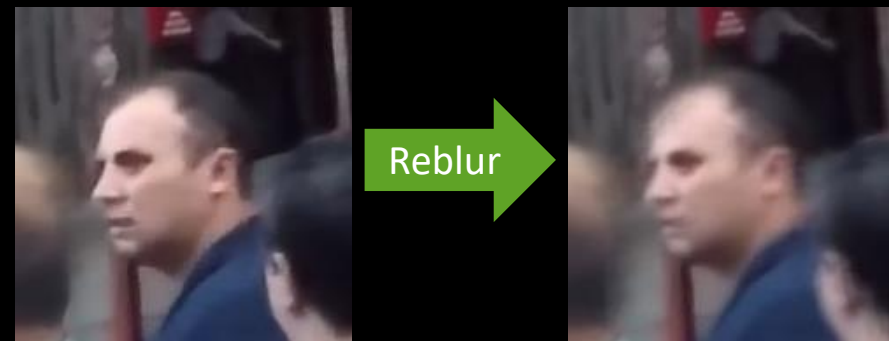

Deblurred

Reblurred

Not sharp enough!

$$L^0 = \mathcal{M}_{\text{D}}(B).$$

**for**  $i = 0 \dots N - 1$  **do**

$$L_{*}^i = \mathcal{M}_{\text{D}}(B).$$

$$\mathcal{L}_{\text{reblur}}^{\text{self}} = \|\mathcal{M}_{\text{R}}(\mathcal{M}_{\text{D}}(B)) - L_{*}^i\|.$$

Update  $\theta_{\text{D}}$  by  $\nabla_{\theta_{\text{D}}} \mathcal{L}_{\text{Reblur}}^{\text{self}}$  and  $\mu$ .

$$L^N = \mathcal{M}_{\text{D}}(B).$$

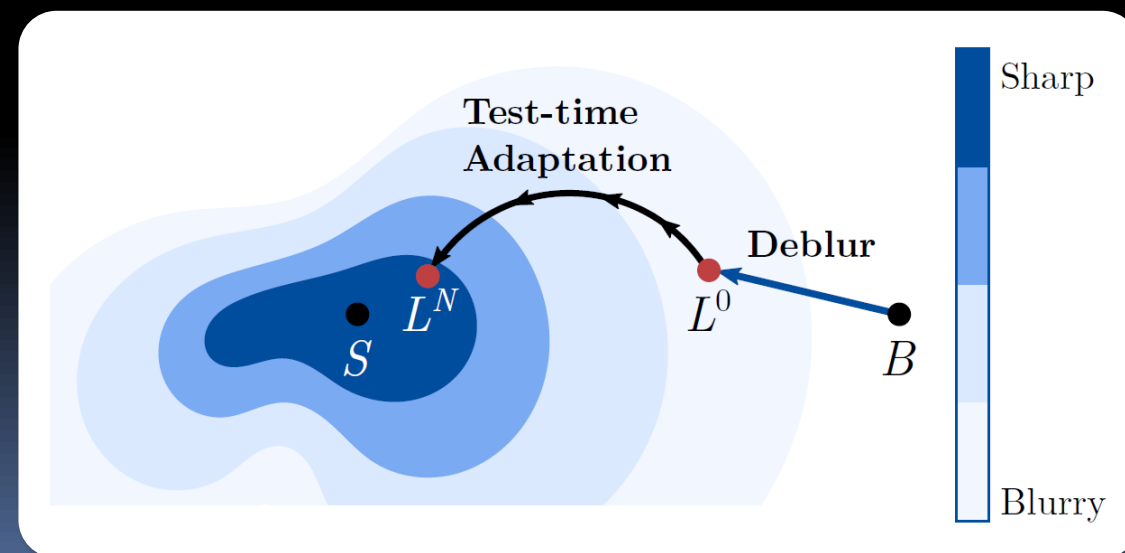



# Qualitative Comparison

- Visual ablation on GOPRO dataset
  - Comparison of training loss

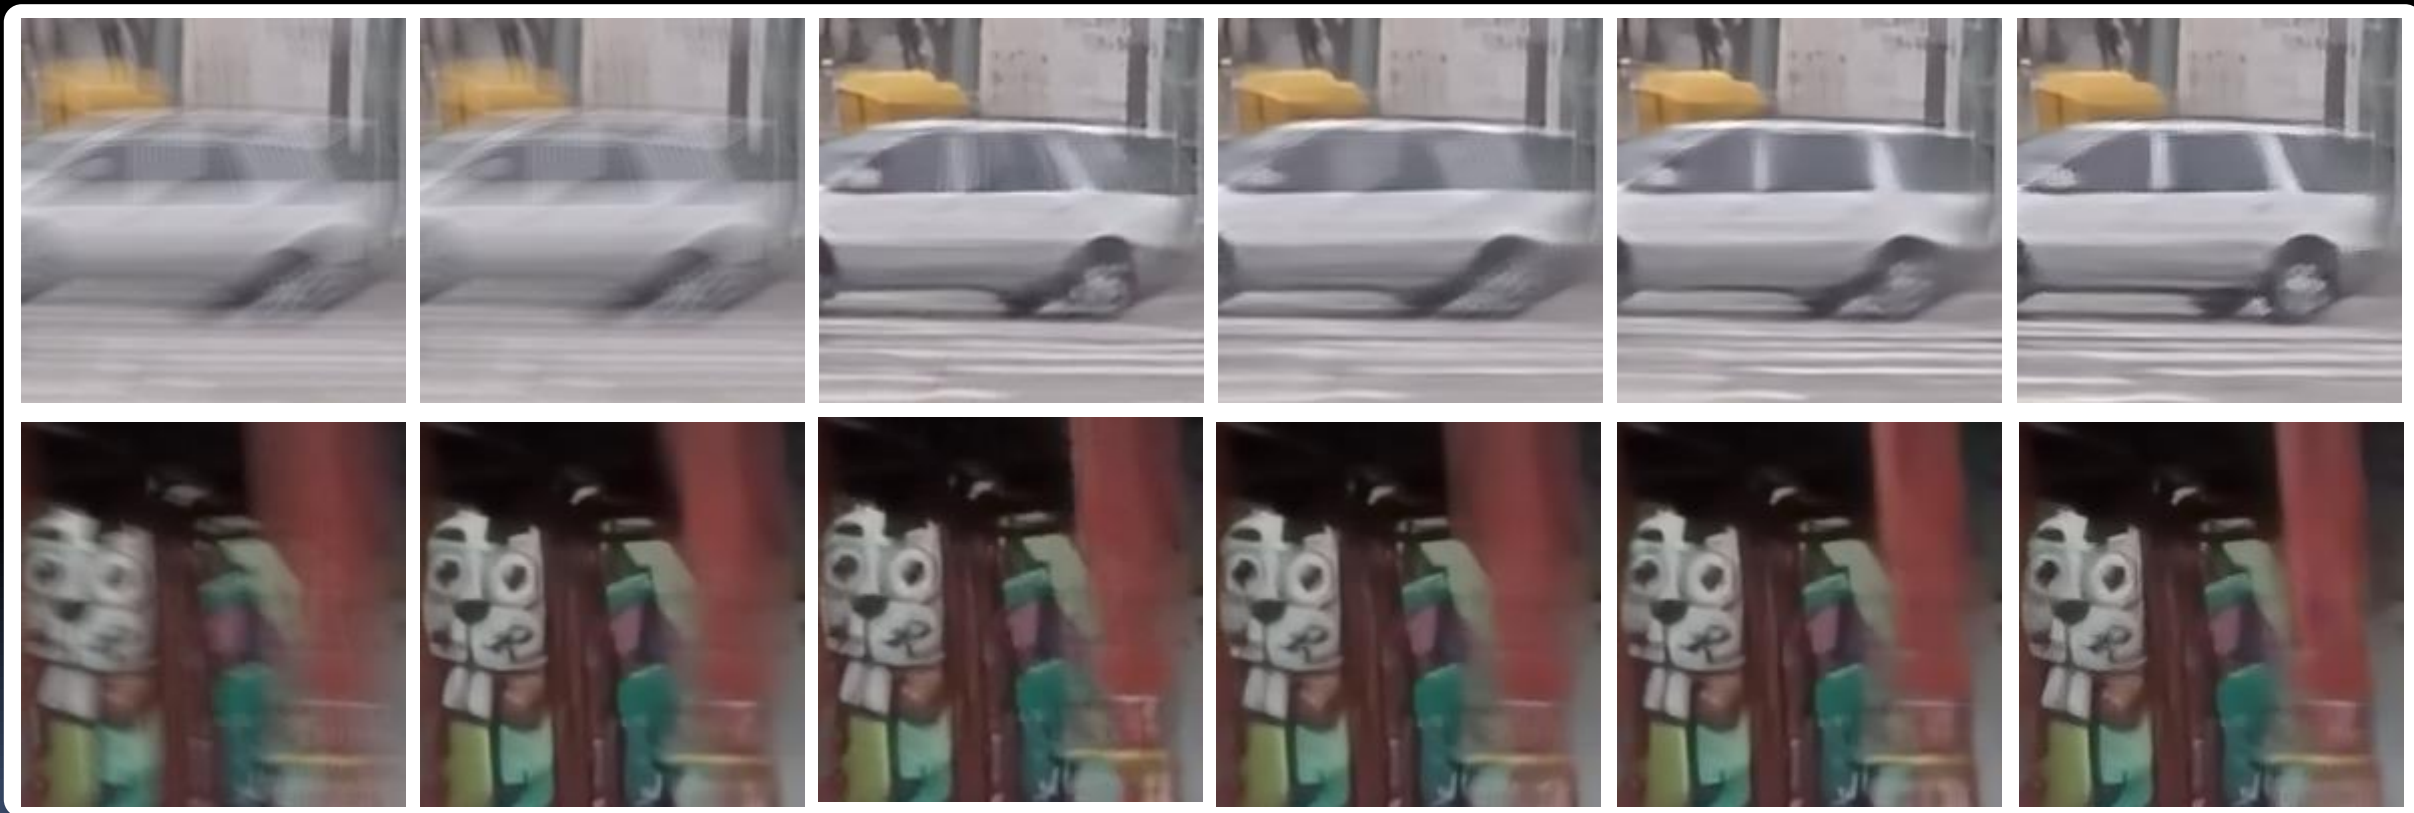

Blur

$\mathcal{L}_1$

$\mathcal{L}_1 + \mathcal{L}_{VGG}$

$\mathcal{L}_1 + \mathcal{L}_{Adv}$

$\mathcal{L}_1 + \mathcal{L}_{Reblur, n1}$

$\mathcal{L}_1 + \mathcal{L}_{Reblur, n2}$

# Qualitative Comparison

- Visual ablation on GOPRO dataset
  - Comparison of training loss

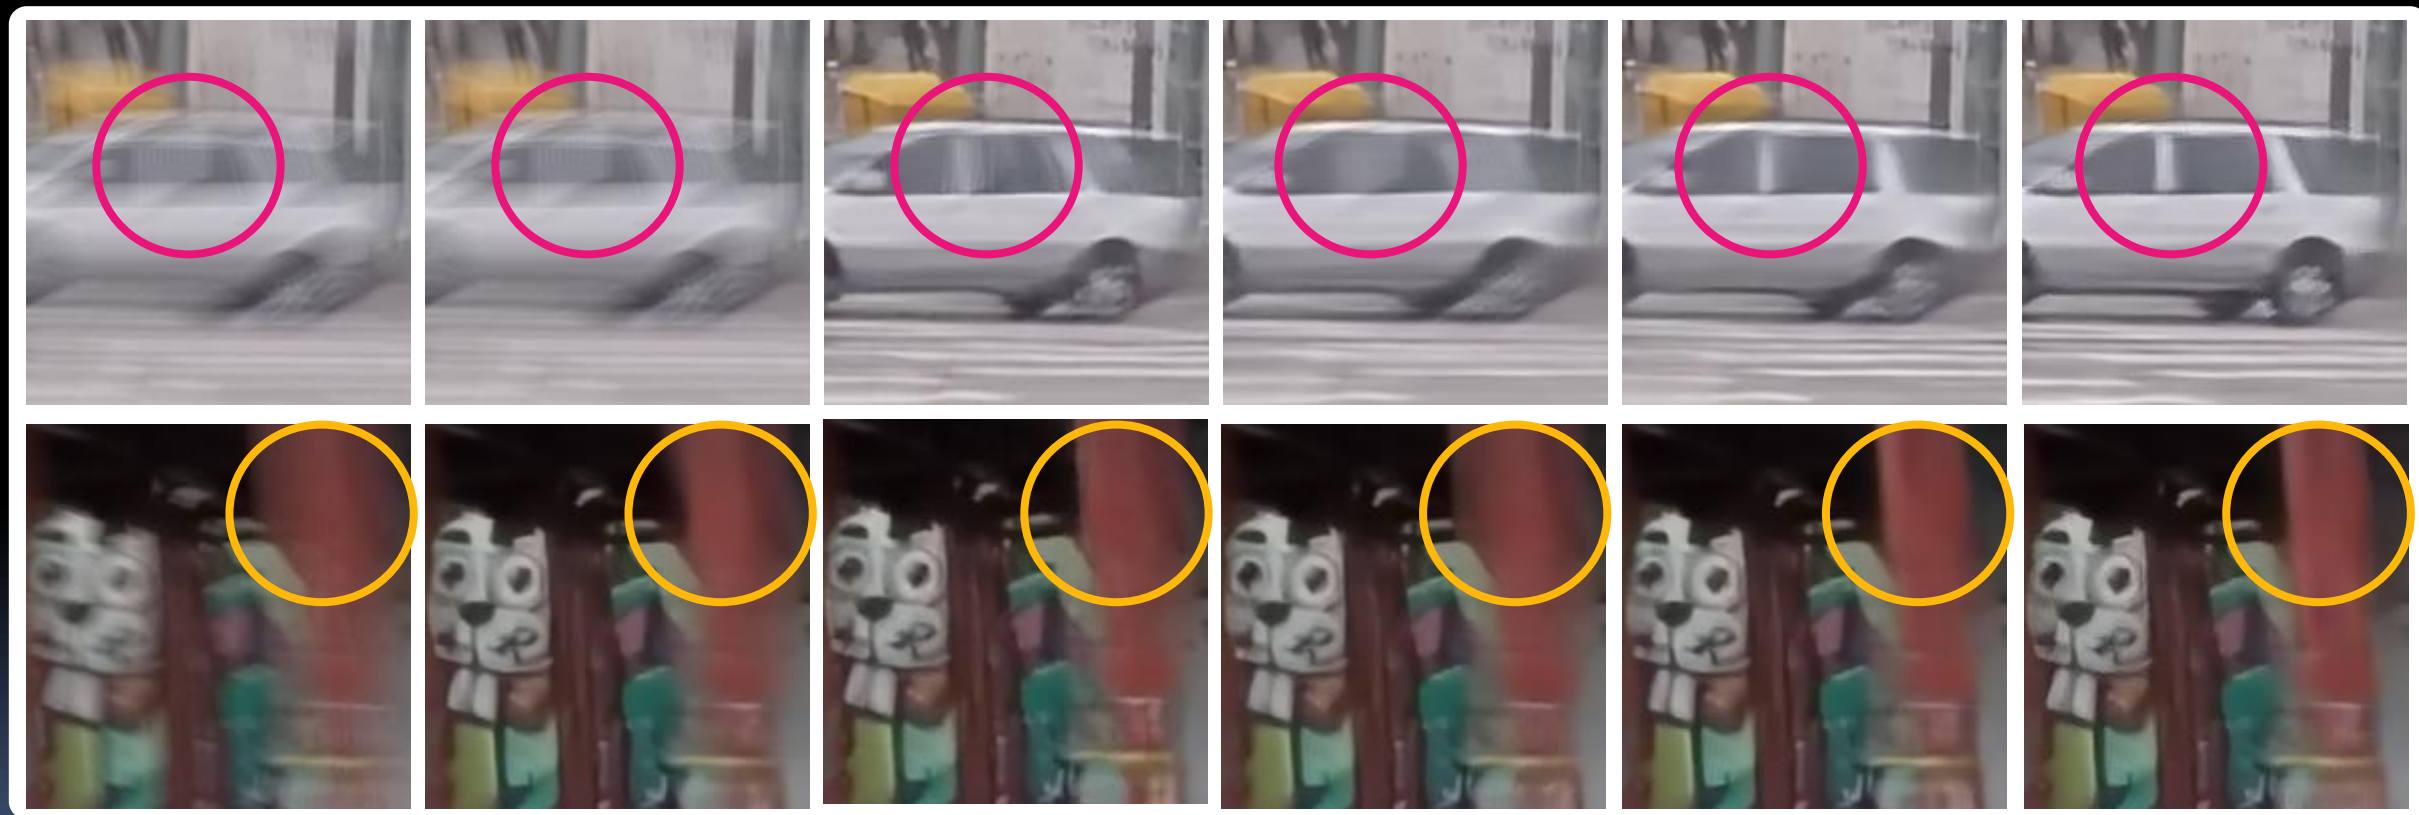

Blur

$\mathcal{L}_1$

$\mathcal{L}_1 + \mathcal{L}_{VGG}$

$\mathcal{L}_1 + \mathcal{L}_{Adv}$

$\mathcal{L}_1 + \mathcal{L}_{Reblur,n1}$

$\mathcal{L}_1 + \mathcal{L}_{Reblur,n2}$

# Qualitative Comparison

- Visual ablation on REDS dataset
  - Effect of test-time adaptation

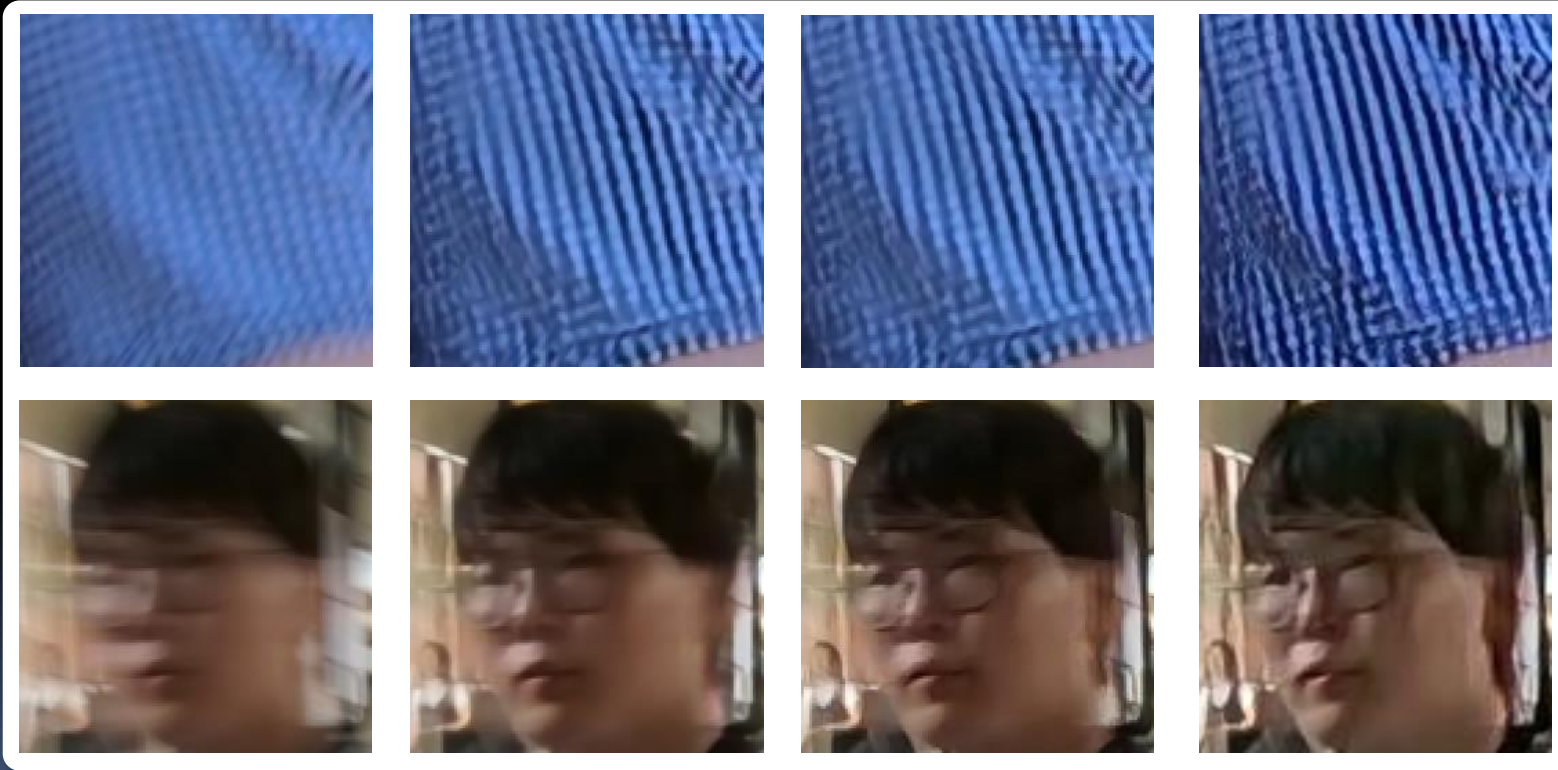

Blur

$\mathcal{L}_1$

$\mathcal{L}_1 + \mathcal{L}_{\text{Reblur},n2}$

+ TTA step 20



# Qualitative Comparison

- Comparison with the State-of-The-Art

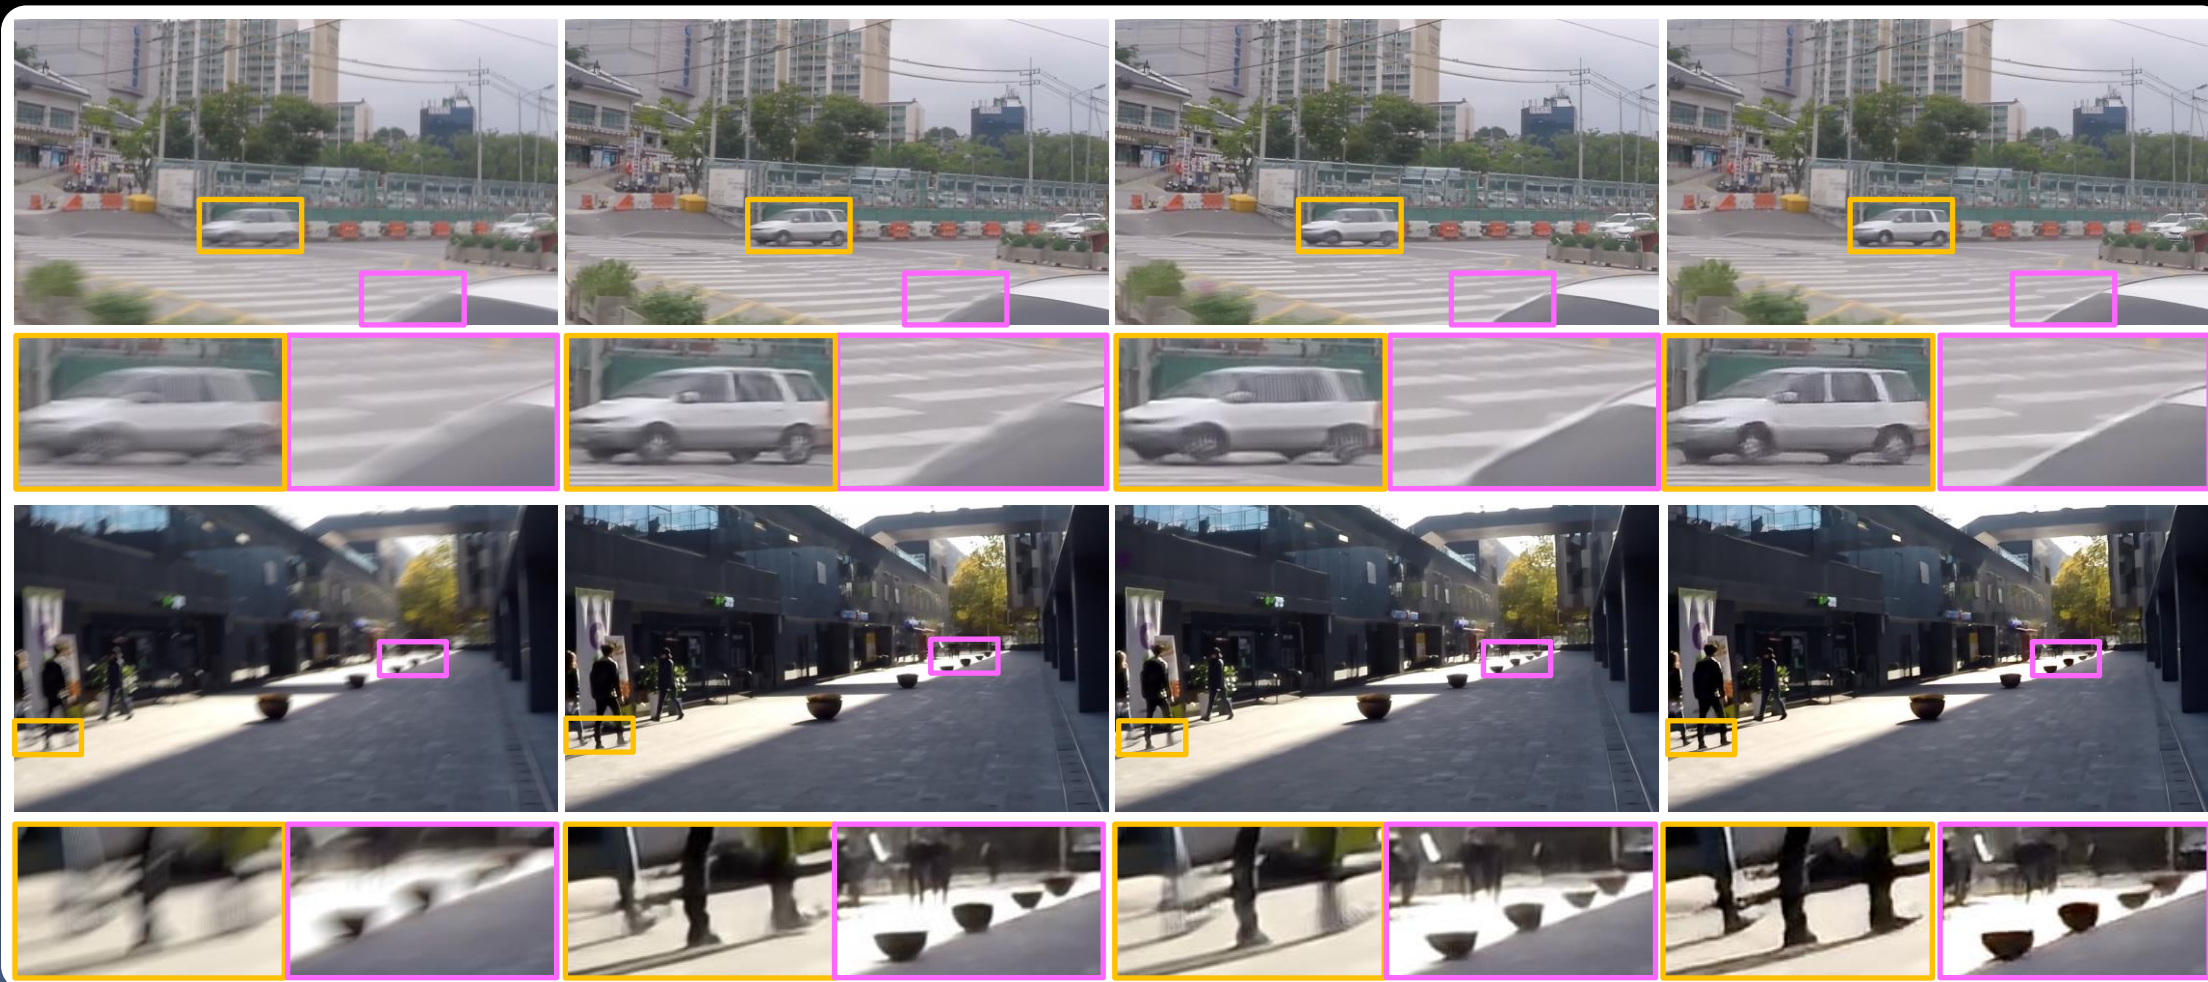

Blur

SE-Sharing (CVPR 2019)

DeblurGAN-v2 (CVPR 2019)

Ours + TTA step 5

# Quantitative Comparison

## ■ GOPRO dataset results

| Method                              | LPIPS <sub>↓</sub> | NIQE <sub>↓</sub> | PSNR <sup>↑</sup> | SSIM <sup>↑</sup> |
|-------------------------------------|--------------------|-------------------|-------------------|-------------------|
| U-Net ( $\mathcal{L}_1$ only)       | 0.1635             | 5.996             | 29.66             | 0.8874            |
| + $\mathcal{L}_{\text{Reblur, n1}}$ | 0.1365             | 5.629             | 29.58             | 0.8869            |
| + $\mathcal{L}_{\text{Reblur, n2}}$ | <b>0.1238</b>      | <b>5.124</b>      | 29.44             | 0.8824            |
| SRN ( $\mathcal{L}_1$ only)         | 0.1246             | 5.252             | 30.62             | 0.9078            |
| + $\mathcal{L}_{\text{Reblur, n1}}$ | 0.1140             | 5.136             | <b>30.74</b>      | <b>0.9104</b>     |
| + $\mathcal{L}_{\text{Reblur, n2}}$ | <b>0.1037</b>      | <b>4.887</b>      | 30.57             | 0.9074            |
| DHN ( $\mathcal{L}_1$ only)         | 0.1179             | 5.490             | <b>31.53</b>      | 0.9207            |
| + $\mathcal{L}_{\text{Reblur, n1}}$ | 0.0975             | 5.472             | <b>31.53</b>      | <b>0.9217</b>     |
| + $\mathcal{L}_{\text{Reblur, n2}}$ | <b>0.0837</b>      | <b>5.076</b>      | 31.34             | 0.9177            |

## ■ REDS dataset results

| Method                              | LPIPS <sub>↓</sub> | NIQE <sub>↓</sub> | PSNR <sup>↑</sup> | SSIM <sup>↑</sup> |
|-------------------------------------|--------------------|-------------------|-------------------|-------------------|
| U-Net ( $\mathcal{L}_1$ only)       | 0.1486             | 3.649             | 30.80             | 0.8772            |
| + $\mathcal{L}_{\text{Reblur, n1}}$ | 0.1435             | 3.487             | 30.76             | <b>0.8776</b>     |
| + $\mathcal{L}_{\text{Reblur, n2}}$ | <b>0.1252</b>      | <b>2.918</b>      | 30.46             | 0.8717            |
| SRN ( $\mathcal{L}_1$ only)         | 0.1148             | 3.392             | 31.89             | 0.8999            |
| + $\mathcal{L}_{\text{Reblur, n1}}$ | 0.1071             | 3.305             | <b>32.01</b>      | <b>0.9044</b>     |
| + $\mathcal{L}_{\text{Reblur, n2}}$ | <b>0.0947</b>      | <b>2.875</b>      | 31.82             | 0.9026            |
| DHN ( $\mathcal{L}_1$ only)         | 0.0942             | 3.288             | 32.65             | 0.9152            |
| + $\mathcal{L}_{\text{Reblur, n1}}$ | 0.0931             | 3.248             | 32.57             | 0.9143            |
| + $\mathcal{L}_{\text{Reblur, n2}}$ | <b>0.0805</b>      | <b>2.830</b>      | 32.44             | 0.9122            |



# Perception-Distortion Trade-Off

- Reblurring loss improves perception-distortion trade-off
  - $\mathcal{L}_{\text{Reblur}}$  improves both the PSNR and perceptual metrics (LPIPS, NIQE)
  - $\mathcal{L}_{\text{Reblur}}^{\text{self}}$  further emphasizes the perceptual quality by adaptation

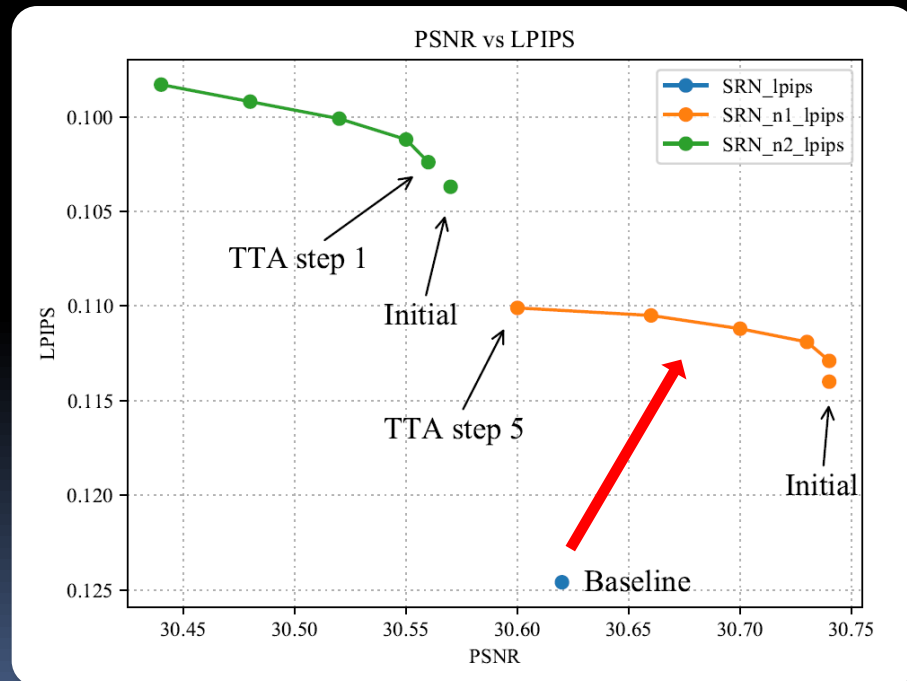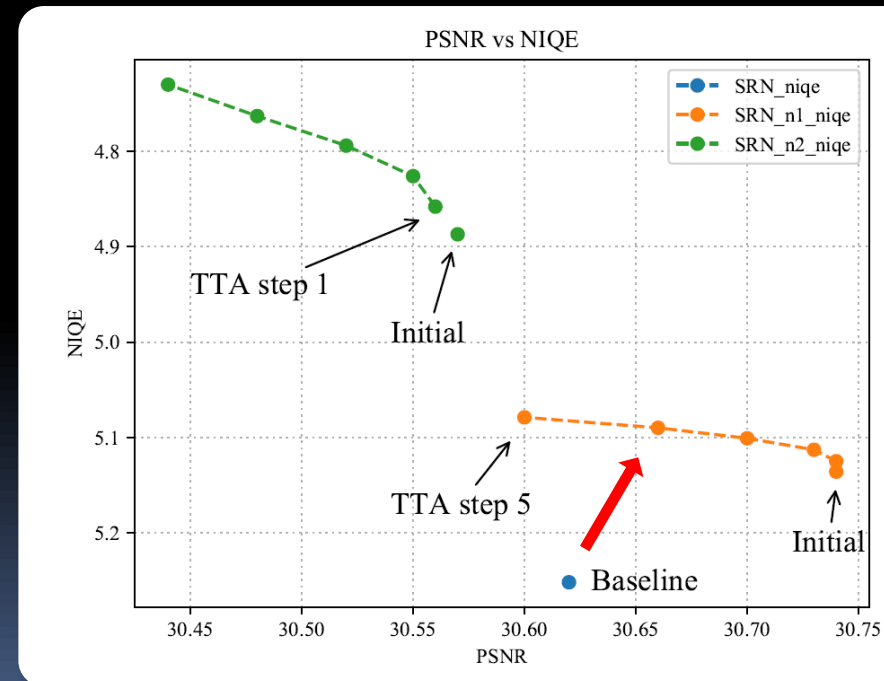

# Summary

- **A new observation:** Clean Images are Hard to Reblur
- **Novel reblurring losses** for deblurring task
- **Test-time adaptation** from self-supervision
- **Improved visual sharpness** compared to other methods

*Thank you*

<https://seungjunnah.github.io>
